# Supplementary material for: Rice exposure to silver nanoparticles in a life cycle study: effect of dose responses on grain metabolomic profile, yield, and soil bacteria
Source: Royal Society of Chemistry journal article supplement (doi:10.1039/d2en00211f), 2022-01-01
Supplement: d2en00211f1.pdf [file d2en00211f1.pdf]

*Supporting Information for*

**Rice Exposure to Silver Nanoparticles in a Life Cycle  
Study: Biphasic Dose-Responses on Grain  
Metabolomic Profile, Yield, and Soil Bacteria**

Xin Yan<sup>1</sup>, Zhengyan Pan<sup>2</sup>, Si Chen<sup>1</sup>, Nibin Shi<sup>1</sup>, Tonghao Bai<sup>1</sup>, Liqiang Dong<sup>2</sup>,

Dongmei Zhou<sup>1</sup>, Jason C. White<sup>3</sup>, Lijuan Zhao<sup>1\*</sup>

<sup>1</sup>State Key Laboratory of Pollution Control and Resource Reuse, School of  
Environment, Nanjing University, Nanjing 210023, China

<sup>2</sup>Liaoning Rice Research Institute, Shenyang, 110101, China

<sup>3</sup>The Connecticut Agricultural Experiment Station (CAES), New Haven, Connecticut  
06504, United States

‡Xin Yan and Zhengyan Pan contribute equally to this work

\*Corresponding author. Email address: [ljzhao@nju.edu.cn](mailto:ljzhao@nju.edu.cn)

**Page S3-4** Table S1 to S2  
**Page S5-8** Figure S1 to S2

**Table S1. Ag content in rice tissues (mg/kg dry weight)**

|                | Control     | 1 mg/kg AgNPs        | 10 mg/kg AgNPs        |
|----------------|-------------|----------------------|-----------------------|
| Polished grain | 1.38 ± 0.32 | 0.98 ± 0.10          | 1.10 ± 0.14           |
| Bran           | 1.16 ± 0.22 | 1.16 ± 0.23          | 3.86 ± 1.83           |
| Rice hull      | 1.50 ± 0.46 | <b>3.12 ± 1.13*</b>  | <b>4.70 ± 1.75*</b>   |
| Leaf           | 1.55 ± 0.50 | 1.78 ± 0.61          | 1.86 ± 0.31           |
| Stem           | 0.67 ± 0.19 | <b>1.26 ± 0.19*</b>  | <b>2.98 ± 1.16*</b>   |
| Root           | 5.68 ± 0.78 | <b>14.40 ± 4.31*</b> | <b>29.24 ± 14.77*</b> |

All data are averages of 4 replicates. \*represent statistical difference at  $p < 0.05$

**Table S2. Mineral nutrient content in polished rice grain (mg/kg dry weight)**

|    | Control       | 1 mg/kg AgNPs        | 10 mg/kg AgNPs       |
|----|---------------|----------------------|----------------------|
| K  | 208.5 ± 4.18  | 169.0 ± 33.17        | <b>168.1 ± 8.64*</b> |
| Ca | 219.6 ± 32.89 | 193.9 ± 68.82        | 199.9 ± 41.90        |
| Mg | 262.6 ± 57.43 | 242.1 ± 50.76        | 279.0 ± 9.10         |
| Fe | 77.04 ± 11.84 | <b>58.48 ± 8.72*</b> | 64.40 ± 12.27        |
| Zn | 15.69 ± 3.11  | 11.50 ± 3.11         | 11.86 ± 2.84         |
| Mn | 9.49 ± 0.94   | 10.72 ± 3.35         | 9.62 ± 1.50          |
| Cu | 7.90 ± 1.69   | 6.28 ± 0.75          | 7.23 ± 0.14          |
| Mo | 1.07 ± 0.20   | <b>0.73 ± 0.11*</b>  | 0.91 ± 0.22          |

All data are averages of 4 replicates. \*represent statistical difference at  $p < 0.05$

| VIP                          | Overlap                                  | T-test                          |
|------------------------------|------------------------------------------|---------------------------------|
| Ethylene glycol              | 1,2,4-benzenetriol                       | 2-monoolein                     |
| Glutaric acid                | 2,4-hexadienedioic acid                  | 3-fluoro-2-hydroxyprop-2-enoate |
| Hydrocinnamic acid           | 3-deoxyhexitol                           | Arachidic acid                  |
| L-arabitol                   | 4-(4-hydroxyphenyl)-4-methyl-2-pentanone | Dodecanol                       |
| Linolenic acid               | Adipic acid                              | Glycolic acid                   |
| Sorbitol                     | Behenic acid                             | Guanosine                       |
| 1-heptanol                   | Benzylalcohol                            | Isocitric acid                  |
| 1-kestose                    | Cellobiose                               | Isomaltose                      |
| 3-hydroxymethylglutaric acid | Citric acid                              | Lauric acid                     |
| D-arabinose                  | L-cysteine-glycine                       | Octanol                         |
| Gluconic acid                | Metharbital                              | Quinic acid                     |
| Glutathione                  | Naproxen                                 | Terephthalic acid               |
| Glycocyamine                 | Ribonic acid                             | 3,4-dihydroxycinnamic acid      |
| L-asparagine                 | Thymine                                  | Chlorogenic acid                |
| L-tryptophan                 | Beta-hydroxymyristic acid                | D-mannose                       |
| L-tyrosine                   | Citraconic acid                          | Fumaric acid                    |
| Salicylaldehyde              | Citrazinic                               | Phenylalanine                   |
| Udp-glucuronic acid          | D-myo-inositol 4-phosphate               | Sophorose                       |
|                              | Itaconic acid                            | Uracil                          |
|                              | L-proline                                |                                 |
|                              | Maleic acid                              |                                 |
|                              | Palatinitol                              |                                 |

**Figure S1.** Up- and Down- regulated metabolites upon exposure to 1 mg/kg AgNPs. Red and green represent up- and down- regulation of metabolites respectively. The results are the combination of non-variate t-test analysis ( $p < 0.05$ ) and top 40 discriminant metabolites screened by VIP score from PLS-DA model.

A

Control  
1 mg/kg AgNPs

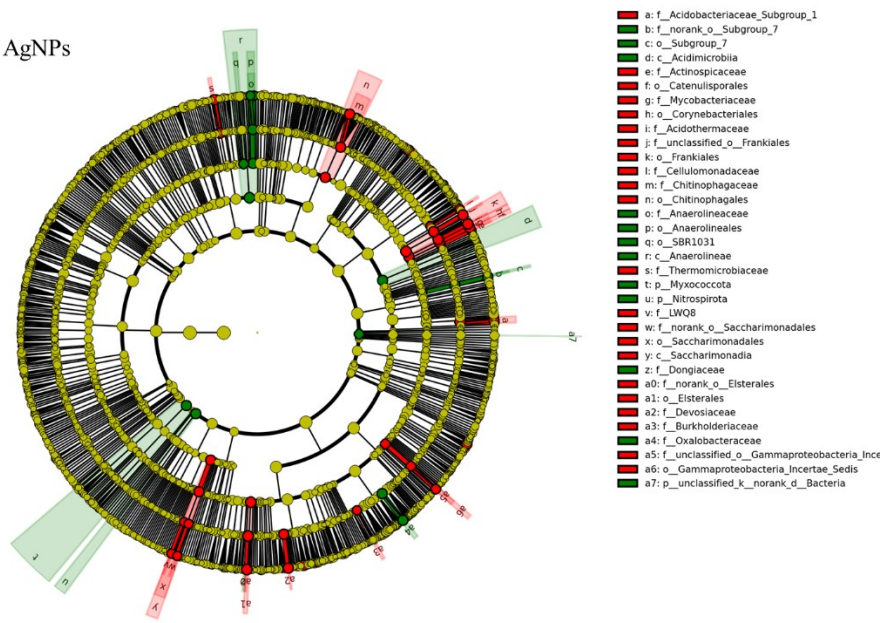

## B

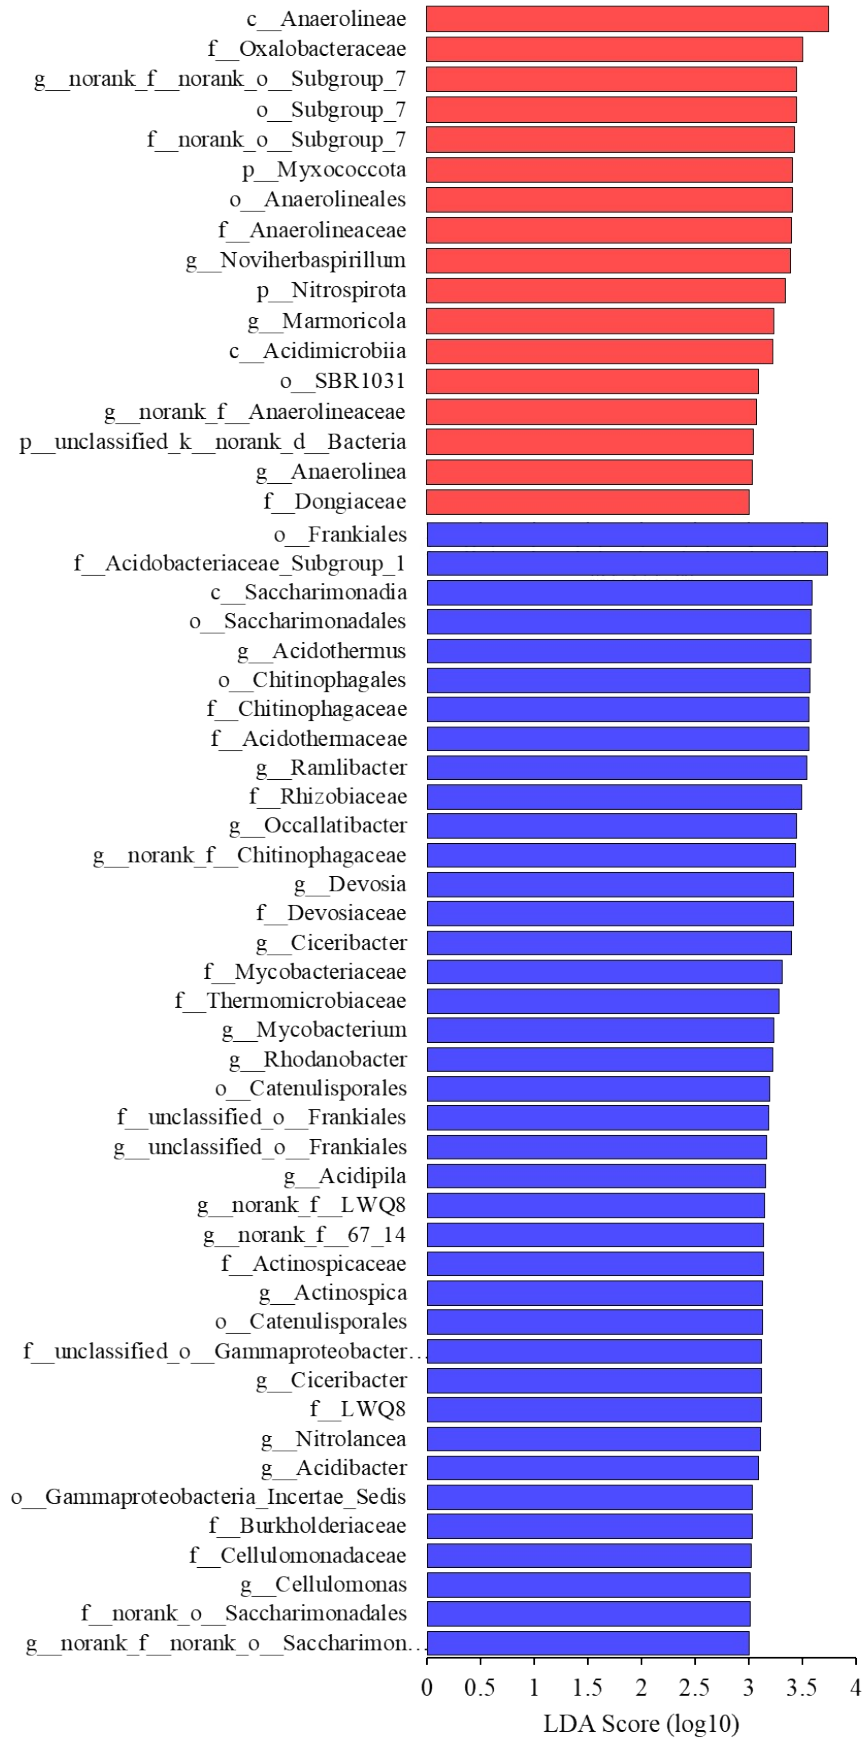

**Figure S2.** (A) LEfSe analysis at multiple taxonomic levels indicates the taxonomic groups with significant differences in abundance between control and 1 mg/kg AgNPs. Each ring of cladogram represents a taxonomic level, with phylum, class, order, family and genus emanating from inside to the outside. (B) LDA score shows taxa enriched in control (red) and 1mg/kg AgNPs (blue) with LDA score >3 and significance of  $p < 0.05$  determined by Wilcoxon signed-rank test.
